# Supplementary material
Source: publisher figshare collection journal article supplement (https://acs.figshare.com/ndownloader/files/4688710)
Supplement: Supplementary file 1 [file 4688710]

_journal_ 'Inorganic Chemistry'
_publ_body_title 'Synthesis, Crystal Structure, Aqueous Speciation and
 Kinetics of Substitution Reactions in a Water Soluble Mo3S4 Cluster 
 Bearing Hydroxyalkyl  Diphosphine Ligands'
_publ_contact_author 'Llusar Barelles Rosa'
_publ_contact_author_address 'Departament de Quimica Fisica i Quimica Analitica,
 Universitat Jaume I, Campus de Riu Sec, P. O. Box 224. Castell�, Spain'
_publ_contact_author_email 'llusar@exp.uji.es'
_publ_contact_author_phone '+34 964 728086'  
  
data_[Mo3S4Cl3(dhmpe)3]Cl
  
_audit_creation_method            SHELXL-97 
_chemical_name_systematic 
; 
 ? 
; 
_chemical_name_common             ? 
_chemical_melting_point           ? 
_chemical_formula_moiety          ? 
_chemical_formula_sum 
 'C18 H48 Cl4 Mo3 O12 P6 S4' 
_chemical_formula_weight          1200.24 
  
loop_ 
 _atom_type_symbol 
 _atom_type_description 
 _atom_type_scat_dispersion_real 
 _atom_type_scat_dispersion_imag 
 _atom_type_scat_source 
 'C'  'C'   0.0033   0.0016 
 'International Tables Vol C Tables 4.2.6.8 and 6.1.1.4' 
 'H'  'H'   0.0000   0.0000 
 'International Tables Vol C Tables 4.2.6.8 and 6.1.1.4' 
 'O'  'O'   0.0106   0.0060 
 'International Tables Vol C Tables 4.2.6.8 and 6.1.1.4' 
 'P'  'P'   0.1023   0.0942 
 'International Tables Vol C Tables 4.2.6.8 and 6.1.1.4' 
 'S'  'S'   0.1246   0.1234 
 'International Tables Vol C Tables 4.2.6.8 and 6.1.1.4' 
 'Cl'  'Cl'   0.1484   0.1585 
 'International Tables Vol C Tables 4.2.6.8 and 6.1.1.4' 
 'Mo'  'Mo'  -1.6832   0.6857 
 'International Tables Vol C Tables 4.2.6.8 and 6.1.1.4' 
  
_symmetry_cell_setting            Hexagonal
_symmetry_space_group_name_H-M    R-3 
  
loop_ 
 _symmetry_equiv_pos_as_xyz 
 'x, y, z' 
 '-y, x-y, z' 
 '-x+y, -x, z' 
 'x+2/3, y+1/3, z+1/3' 
 '-y+2/3, x-y+1/3, z+1/3' 
 '-x+y+2/3, -x+1/3, z+1/3' 
 'x+1/3, y+2/3, z+2/3' 
 '-y+1/3, x-y+2/3, z+2/3' 
 '-x+y+1/3, -x+2/3, z+2/3' 
 '-x, -y, -z' 
 'y, -x+y, -z' 
 'x-y, x, -z' 
 '-x+2/3, -y+1/3, -z+1/3' 
 'y+2/3, -x+y+1/3, -z+1/3' 
 'x-y+2/3, x+1/3, -z+1/3' 
 '-x+1/3, -y+2/3, -z+2/3' 
 'y+1/3, -x+y+2/3, -z+2/3' 
 'x-y+1/3, x+2/3, -z+2/3' 
  
_cell_length_a                    12.6863(12) 
_cell_length_b                    12.6863(12) 
_cell_length_c                    43.813(8) 
_cell_angle_alpha                 90.00 
_cell_angle_beta                  90.00 
_cell_angle_gamma                 120.00 
_cell_volume                      6106.6(14) 
_cell_formula_units_Z             6 
_cell_measurement_temperature     293(2) 
_cell_measurement_reflns_used     ? 
_cell_measurement_theta_min       ? 
_cell_measurement_theta_max       ? 
  
_exptl_crystal_description        cube 
_exptl_crystal_colour             green 
_exptl_crystal_size_max           0.2 
_exptl_crystal_size_mid           0.14 
_exptl_crystal_size_min           0.14 
_exptl_crystal_density_meas       ? 
_exptl_crystal_density_diffrn     1.958 
_exptl_crystal_density_method     'not measured' 
_exptl_crystal_F_000              3600 
_exptl_absorpt_coefficient_mu     1.663 
_exptl_absorpt_correction_type    'Bruker SADABS'
_exptl_absorpt_correction_T_min   ? 
_exptl_absorpt_correction_T_max   ? 
_exptl_absorpt_process_details    ? 
_Ratio_of_minimum_to_maximum_apparent_transmission 0.932809
  
_exptl_special_details 
; 
 ? 
; 
  
_diffrn_ambient_temperature       293(2) 
_diffrn_radiation_wavelength      0.71073 
_diffrn_radiation_type            MoK\a 
_diffrn_radiation_source          'fine-focus sealed tube' 
_diffrn_radiation_monochromator   graphite 
_diffrn_measurement_device_type   'CCD area detector' 
_diffrn_measurement_method        'phi and omega scans' 
_diffrn_detector_area_resol_mean  ? 
_diffrn_standards_number          ? 
_diffrn_standards_interval_count  ? 
_diffrn_standards_interval_time   ? 
_diffrn_standards_decay_%         ? 
_diffrn_reflns_number             16730 
_diffrn_reflns_av_R_equivalents   0.0615 
_diffrn_reflns_av_sigmaI/netI     0.0578 
_diffrn_reflns_limit_h_min        -17 
_diffrn_reflns_limit_h_max        18 
_diffrn_reflns_limit_k_min        -18 
_diffrn_reflns_limit_k_max        13 
_diffrn_reflns_limit_l_min        -38 
_diffrn_reflns_limit_l_max        62 
_diffrn_reflns_theta_min          1.91 
_diffrn_reflns_theta_max          30.55 
_reflns_number_total              3983 
_reflns_number_gt                 2924 
_reflns_threshold_expression      >2sigma(I) 
  
_computing_data_collection        'Bruker SMART' 
_computing_cell_refinement        'Bruker SMART' 
_computing_data_reduction         'Bruker SAINT' 
_computing_structure_solution     'SHELXS-97 (Sheldrick, 1990)' 
_computing_structure_refinement   'SHELXL-97 (Sheldrick, 1997)' 
_computing_molecular_graphics     'Bruker SHELXTL' 
_computing_publication_material   'Bruker SHELXTL'  
  
_refine_special_details 
; 
 Refinement of F^2^ against ALL reflections.  The weighted R-factor wR and 
 goodness of fit S are based on F^2^, conventional R-factors R are based 
 on F, with F set to zero for negative F^2^. The threshold expression of 
 F^2^ > 2sigma(F^2^) is used only for calculating R-factors(gt) etc. and is 
 not relevant to the choice of reflections for refinement.  R-factors based 
 on F^2^ are statistically about twice as large as those based on F, and R- 
 factors based on ALL data will be even larger. 
; 
  
_refine_ls_structure_factor_coef  Fsqd 
_refine_ls_matrix_type            full 
_refine_ls_weighting_scheme       calc 
_refine_ls_weighting_details 
 'calc w=1/[\s^2^(Fo^2^)+(0.0593P)^2^+32.6944P] where P=(Fo^2^+2Fc^2^)/3' 
_atom_sites_solution_primary      direct 
_atom_sites_solution_secondary    difmap 
_atom_sites_solution_hydrogens    '' 
_refine_ls_hydrogen_treatment     none 
_refine_ls_extinction_method      none 
_refine_ls_extinction_coef        ? 
_refine_ls_number_reflns          3983 
_refine_ls_number_parameters      160 
_refine_ls_number_restraints      0 
_refine_ls_R_factor_all           0.0770 
_refine_ls_R_factor_gt            0.0472 
_refine_ls_wR_factor_ref          0.1300 
_refine_ls_wR_factor_gt           0.1181 
_refine_ls_goodness_of_fit_ref    1.072 
_refine_ls_restrained_S_all       1.072 
_refine_ls_shift/su_max           0.001 
_refine_ls_shift/su_mean          0.000 
  
loop_ 
 _atom_site_label 
 _atom_site_type_symbol 
 _atom_site_fract_x 
 _atom_site_fract_y 
 _atom_site_fract_z 
 _atom_site_U_iso_or_equiv 
 _atom_site_adp_type 
 _atom_site_occupancy 
 _atom_site_symmetry_multiplicity 
 _atom_site_calc_flag 
 _atom_site_refinement_flags 
 _atom_site_disorder_assembly 
 _atom_site_disorder_group 
Mo1 Mo 0.55659(3) 0.36079(3) 0.084414(8) 0.02029(12) Uani 1 1 d . . . 
S1 S 0.6667 0.3333 0.04481(4) 0.0218(4) Uani 1 3 d S . . 
S2 S 0.49463(11) 0.19894(11) 0.11636(3) 0.0290(3) Uani 1 1 d . . . 
Cl1 Cl 0.55518(11) 0.51653(11) 0.04905(3) 0.0343(3) Uani 1 1 d . . . 
P1 P 0.41378(12) 0.40723(12) 0.11416(3) 0.0311(3) Uani 1 1 d . . . 
P2 P 0.35138(11) 0.23905(11) 0.05608(3) 0.0276(3) Uani 1 1 d . . . 
C1 C 0.3765(6) 0.3525(6) 0.15398(14) 0.0520(16) Uani 1 1 d . . . 
C2 C 0.4641(6) 0.5720(5) 0.11695(15) 0.0466(14) Uani 1 1 d . . . 
C3 C 0.2602(5) 0.3363(6) 0.09727(14) 0.0447(14) Uani 1 1 d . . . 
C4 C 0.2622(4) 0.3156(5) 0.06282(13) 0.0374(12) Uani 1 1 d . . . 
C5 C 0.2462(5) 0.0808(5) 0.06936(16) 0.0460(15) Uani 1 1 d . . . 
C6 C 0.3597(5) 0.2285(5) 0.01424(12) 0.0382(12) Uani 1 1 d . . . 
O1 O 0.4765(5) 0.4181(5) 0.17365(10) 0.0716(15) Uani 1 1 d . . . 
O2 O 0.3951(7) 0.5921(7) 0.13914(16) 0.0602(18) Uani 0.70 1 d P . . 
O3 O 0.1284(6) 0.0400(7) 0.0639(4) 0.203(8) Uani 0.75 1 d P . . 
O22 O 0.4258(16) 0.6133(13) 0.0895(4) 0.061(4) Uani 0.30 1 d P . . 
O33 O 0.2242(15) 0.0862(18) 0.0995(4) 0.066(6) Uani 0.25 1 d P . . 
O4 O 0.2427(4) 0.1689(4) 0.00033(10) 0.0491(10) Uani 1 1 d . . . 
Cl2 Cl 0.6667 0.3333 0.19210(9) 0.0950(13) Uani 1 3 d S . . 
  
loop_ 
 _atom_site_aniso_label 
 _atom_site_aniso_U_11 
 _atom_site_aniso_U_22 
 _atom_site_aniso_U_33 
 _atom_site_aniso_U_23 
 _atom_site_aniso_U_13 
 _atom_site_aniso_U_12 
Mo1 0.01864(19) 0.01961(19) 0.02320(19) -0.00108(14) 0.00025(14) 0.00999(15) 
S1 0.0218(5) 0.0218(5) 0.0220(9) 0.000 0.000 0.0109(3) 
S2 0.0296(6) 0.0289(6) 0.0299(6) 0.0064(5) 0.0090(5) 0.0157(5) 
Cl1 0.0307(6) 0.0289(6) 0.0438(7) 0.0072(5) -0.0016(5) 0.0154(5) 
P1 0.0286(6) 0.0311(6) 0.0360(7) -0.0069(5) 0.0034(5) 0.0167(5) 
P2 0.0202(5) 0.0274(6) 0.0336(7) -0.0062(5) -0.0012(5) 0.0106(5) 
C1 0.060(4) 0.060(4) 0.036(3) -0.005(3) 0.014(3) 0.030(3) 
C2 0.054(4) 0.037(3) 0.056(4) -0.011(3) 0.005(3) 0.028(3) 
C3 0.028(3) 0.059(4) 0.053(4) -0.022(3) -0.004(2) 0.026(3) 
C4 0.025(2) 0.045(3) 0.050(3) -0.013(2) -0.005(2) 0.023(2) 
C5 0.021(2) 0.030(3) 0.071(4) 0.000(3) 0.006(2) 0.001(2) 
C6 0.033(3) 0.048(3) 0.034(3) -0.011(2) -0.010(2) 0.021(2) 
O1 0.090(4) 0.081(4) 0.039(3) -0.017(2) -0.010(3) 0.039(3) 
O2 0.073(4) 0.073(4) 0.063(4) -0.020(4) -0.003(3) 0.057(4) 
O3 0.025(4) 0.045(5) 0.53(3) 0.020(9) -0.008(8) 0.012(3) 
O22 0.098(12) 0.040(8) 0.050(9) -0.003(7) -0.003(8) 0.039(8) 
O33 0.038(9) 0.085(14) 0.033(9) 0.026(9) -0.002(7) -0.001(9) 
O4 0.046(2) 0.054(2) 0.055(3) -0.018(2) -0.026(2) 0.031(2) 
Cl2 0.116(2) 0.116(2) 0.054(2) 0.000 0.000 0.0578(10) 
  
_geom_special_details 
; 
 All esds (except the esd in the dihedral angle between two l.s. planes) 
 are estimated using the full covariance matrix.  The cell esds are taken 
 into account individually in the estimation of esds in distances, angles 
 and torsion angles; correlations between esds in cell parameters are only 
 used when they are defined by crystal symmetry.  An approximate (isotropic) 
 treatment of cell esds is used for estimating esds involving l.s. planes. 
; 
  
loop_ 
 _geom_bond_atom_site_label_1 
 _geom_bond_atom_site_label_2 
 _geom_bond_distance 
 _geom_bond_site_symmetry_2 
 _geom_bond_publ_flag 
Mo1 S2 2.2757(12) . ? 
Mo1 S2 2.3232(12) 3_665 ? 
Mo1 S1 2.3599(14) . ? 
Mo1 Cl1 2.5178(12) . ? 
Mo1 P1 2.5288(13) . ? 
Mo1 P2 2.5852(13) . ? 
Mo1 Mo1 2.7702(7) 3_665 ? 
Mo1 Mo1 2.7702(7) 2_655 ? 
S1 Mo1 2.3599(14) 3_665 ? 
S1 Mo1 2.3599(14) 2_655 ? 
S2 Mo1 2.3232(12) 2_655 ? 
P1 C3 1.844(5) . ? 
P1 C1 1.850(6) . ? 
P1 C2 1.860(6) . ? 
P2 C6 1.845(5) . ? 
P2 C4 1.846(5) . ? 
P2 C5 1.863(6) . ? 
C1 O1 1.410(8) . ? 
C2 O2 1.413(8) . ? 
C2 O22 1.489(16) . ? 
C3 C4 1.535(8) . ? 
C5 O3 1.337(9) . ? 
C5 O33 1.357(18) . ? 
C6 O4 1.423(6) . ? 
  
loop_ 
 _geom_angle_atom_site_label_1 
 _geom_angle_atom_site_label_2 
 _geom_angle_atom_site_label_3 
 _geom_angle 
 _geom_angle_site_symmetry_1 
 _geom_angle_site_symmetry_3 
 _geom_angle_publ_flag 
S2 Mo1 S2 96.91(7) . 3_665 ? 
S2 Mo1 S1 106.37(4) . . ? 
S2 Mo1 S1 104.84(4) 3_665 . ? 
S2 Mo1 Cl1 162.12(4) . . ? 
S2 Mo1 Cl1 94.05(5) 3_665 . ? 
S1 Mo1 Cl1 84.28(4) . . ? 
S2 Mo1 P1 85.92(4) . . ? 
S2 Mo1 P1 83.96(4) 3_665 . ? 
S1 Mo1 P1 163.55(5) . . ? 
Cl1 Mo1 P1 81.21(5) . . ? 
S2 Mo1 P2 88.05(5) . . ? 
S2 Mo1 P2 159.19(4) 3_665 . ? 
S1 Mo1 P2 92.99(4) . . ? 
Cl1 Mo1 P2 76.89(4) . . ? 
P1 Mo1 P2 76.22(4) . . ? 
S2 Mo1 Mo1 98.98(3) . 3_665 ? 
S2 Mo1 Mo1 52.18(3) 3_665 3_665 ? 
S1 Mo1 Mo1 54.06(3) . 3_665 ? 
Cl1 Mo1 Mo1 98.90(3) . 3_665 ? 
P1 Mo1 Mo1 136.12(3) . 3_665 ? 
P2 Mo1 Mo1 147.01(3) . 3_665 ? 
S2 Mo1 Mo1 53.75(3) . 2_655 ? 
S2 Mo1 Mo1 97.81(3) 3_665 2_655 ? 
S1 Mo1 Mo1 54.06(3) . 2_655 ? 
Cl1 Mo1 Mo1 138.31(3) . 2_655 ? 
P1 Mo1 Mo1 139.63(3) . 2_655 ? 
P2 Mo1 Mo1 101.36(3) . 2_655 ? 
Mo1 Mo1 Mo1 60.0 3_665 2_655 ? 
Mo1 S1 Mo1 71.88(5) 3_665 2_655 ? 
Mo1 S1 Mo1 71.88(5) 3_665 . ? 
Mo1 S1 Mo1 71.88(5) 2_655 . ? 
Mo1 S2 Mo1 74.07(4) . 2_655 ? 
C3 P1 C1 100.7(3) . . ? 
C3 P1 C2 105.0(3) . . ? 
C1 P1 C2 103.9(3) . . ? 
C3 P1 Mo1 112.65(17) . . ? 
C1 P1 Mo1 118.5(2) . . ? 
C2 P1 Mo1 114.4(2) . . ? 
C6 P2 C4 105.6(3) . . ? 
C6 P2 C5 105.6(3) . . ? 
C4 P2 C5 102.7(3) . . ? 
C6 P2 Mo1 116.31(17) . . ? 
C4 P2 Mo1 107.93(17) . . ? 
C5 P2 Mo1 117.3(2) . . ? 
O1 C1 P1 111.7(4) . . ? 
O2 C2 O22 98.8(8) . . ? 
O2 C2 P1 110.6(5) . . ? 
O22 C2 P1 110.7(6) . . ? 
C4 C3 P1 111.9(3) . . ? 
C3 C4 P2 108.4(4) . . ? 
O3 C5 O33 88.6(11) . . ? 
O3 C5 P2 114.9(6) . . ? 
O33 C5 P2 107.7(9) . . ? 
O4 C6 P2 112.4(4) . . ? 
  
_diffrn_measured_fraction_theta_max    0.957 
_diffrn_reflns_theta_full              30.55 
_diffrn_measured_fraction_theta_full   0.957 
_refine_diff_density_max    1.080 
_refine_diff_density_min   -1.076 
_refine_diff_density_rms    0.154 
  
